# Supplementary material
Source: publisher figshare collection journal article supplement (https://frontiersin.figshare.com/ndownloader/files/22448795)
Supplement: Supplementary file 1 [file 22448795]

## Appendix

TABLE A1: Real words: Accuracy predicted by background variables.

Generalized linear mixed model fit by maximum likelihood (Laplace Approximation) ['glmerMod']

Family: binomial ( logit )

Formula: Accuracy ~ Family + Age + CurrentExposureToHLSchooling + KStart + MinorityCommunity + (1 | Code) + (1 | Item) + (1 | Condition) + (1 | Country)

With Latvia

| Fixed effects                      | Estimate (SE)          |
|------------------------------------|------------------------|
| Intercept                          | 1.27 (1.2)             |
| <b>Family</b>                      | <b>-1.56 (0.3) ***</b> |
| <b>Age</b>                         | <b>0.05 (0.01) ***</b> |
| CurrentExposureToMinoritySchooling | 0.03 (0.02) .          |
| Kindergarten Start                 | -0.16 (0.3)            |
| <b>Minority Community</b>          | <b>0.04 (0.02) *</b>   |

Without Latvia

| Fixed effects                             | Estimate (SE)          |
|-------------------------------------------|------------------------|
| Intercept                                 | 1.51 (1.1)             |
| <b>Family</b>                             | <b>-1.68 (0.3) ***</b> |
| <b>Age</b>                                | <b>0.04 (0.01) ***</b> |
| <b>CurrentExposureToMinoritySchooling</b> | <b>0.06 (0.02) ***</b> |
| Kindergarten Start                        | -0.004 (0.18)          |
| Minority Community                        | 0.07 (0.04) .          |

TABLE A2: Nonce words: Probability of using M depending on background variables.

Generalized linear mixed model fit by maximum likelihood (Laplace Approximation) ['glmerMod']

Family: binomial ( logit )

Formula: Masc ~ Family + Age + CurrentExposureToHLSchooling + KStart + (1 | Code) + (1 | Item1) + (1 | Cue)

| Fixed effects                             | Estimate (SE)          |
|-------------------------------------------|------------------------|
| Intercept                                 | 2.25 (0.86) **         |
| <b>Family (mixed)</b>                     | <b>1.47 (0.3) ***</b>  |
| <b>Age</b>                                | <b>-0.02 (0.01) *</b>  |
| <b>CurrentExposureToMinoritySchooling</b> | <b>-0.04 (0.02) **</b> |
| <b>Kindergarten Start</b>                 | <b>-0.39 (0.2) *</b>   |
